# Supplementary material
Source: Springer Nature journal article supplement (https://www.springermedizin.de/resource/supplementary/12872_2006_124_MOESM1_ESM.pdf/9431068)
Supplement: MOESM1 [file 9431068]

1062 members of BKK Hoechst  
insurance plan  
receive invitation letter

382 subjects (36.0%)  
reported to the study centre  
in Bochum

270 subjects  
sent written confirmation

100 women and 100 men  
selected for study participation  
192 participated (96%)

20 selected for pilot study  
18 participated (90%)

### **Study day**

144 subjects for duplicate ABI measurements

Group 1 (8 a.m.): 36 participants

Group 2 (9:30 a.m.): 36 participants

Group 3 (12 a.m.): 36 participants

Group 4 (1:30 p.m.): 36 participants

48 stand-by subjects (only one ABI measurement)

### **Analysed patients**

117 subjects with 6 ABI measurements, of them  
108 in the main analysis

17 subjects with 5 ABI measurements

10 subjects with 3 or 4 ABI measurements

### **No ABI measurement**

on 3 subjects:

1 withdrew consent

2 for technical reasons
